# Supplementary material
Source: ML conference proceedings conference paper supplement (https://openreview.net/forum?id=WnSl42M9Z4)
Supplement: supplementary_material [file attachment]

# Supplementary Materials for HumanPlus: Humanoid Shadowing and Imitation from Humans

Anonymous Author(s)

Affiliation

Address

email

1 Videos of all the tasks can be found at <https://humanplus-sub.github.io>.

## 2 1 Details on Humanoid Shadowing Transformer

| Environment Params   | Ranges                  |
|----------------------|-------------------------|
| base payload         | $[-3.0, 3.0]\text{kg}$  |
| end-effector payload | $[0, 0.5]\text{kg}$     |
| center of base mass  | $[-0.1, 0.1]^3\text{m}$ |
| motor strength       | $[0.8, 1.1]$            |
| friction             | $[0.3, 0.9]$            |
| control delay        | $[0.02, 0.04]\text{s}$  |

Table 1: **Randomization in Simulation.** We uniformly sample from these randomization ranges during training in simulation.

| Reward Teams           | Expressions                                                  | Weight |
|------------------------|--------------------------------------------------------------|--------|
| target xy velocities   | $\exp(- v_x, v_y - [v_x^{\text{tg}}, v_y^{\text{tg}}] )$     | 0.5    |
| target yaw velocities  | $\exp(- v_{\text{yaw}} - v_{\text{yaw}}^{\text{tg}} )$       | 0.5    |
| target joint positions | $- q - q^{\text{tg}} _2^2$                                   | 3      |
| target roll & pitch    | $- [r, p] - [r^{\text{tg}}, p^{\text{tg}}] _2^2$             | 3      |
| energy                 | $- \tau \dot{q} _2^2$                                        | 2e-5   |
| feet slipping          | $- v_{\text{feet}} \cdot \mathbb{1}[F_{\text{feet}} > 1] _2$ | 1      |
| alive                  | 1                                                            | 1      |

Table 2: **Rewards in Simulation.** We denote  $v_x$  as linear  $x$  velocity,  $v_y$  as linear  $y$  velocity,  $v_{\text{yaw}}$  as angular yaw velocity,  $q$  as joint positions,  $\dot{q}$  as joint velocities,  $r$  as roll,  $p$  as pitch,  $v_{\text{feet}}$  as feet velocities,  $F_{\text{feet}}$  as forces on feet, and  $\cdot^{\text{tg}}$  as targets.

3 We list all the reward terms in the Table 2. We randomize the physical parameters of the simulated  
4 environment and humanoids with details in Table 1. We list the hyperparameters of PPO in Table 3.

## 5 2 Details on Humanoid Imitation Transformer

6 We list the hyperparameters of ACT in Table 4 and the hyperparameters of our Humanoid Imitation  
7 Transformer in Table 5.

Table 3: Training Hyper-parameters

|                                                |      |
|------------------------------------------------|------|
| PPO clip range                                 | 0.2  |
| Learning rate                                  | 2e-5 |
| Generalized Advantage Estimation $\lambda$     | 0.95 |
| Number of environments                         | 3500 |
| Reward discount factor                         | 0.99 |
| Learning epochs per training batch             | 5    |
| Number of environment steps per training batch | 24   |
| Number of mini-batches per training batch      | 4    |
| Minimum policy std                             | 0.2  |

|                       |                     |
|-----------------------|---------------------|
| learning rate         | 1e-5                |
| batch size            | 48                  |
| # encoder layers      | 6                   |
| # decoder layers      | 6                   |
| feedforward dimension | 512                 |
| hidden dimension      | 512                 |
| chunk size            | 50                  |
| dropout               | 0.1                 |
| backbone              | pretrained ResNet18 |

Table 4: *Hyperparameters of Humanoid Imitation Transformer.*

|                           |                     |
|---------------------------|---------------------|
| learning rate             | 1e-5                |
| batch size                | 48                  |
| # decoder layers          | 6                   |
| image feature loss weight | 0.005               |
| feedforward dimension     | 3200                |
| hidden dimension          | 512                 |
| chunk size                | 50                  |
| dropout                   | 0.1                 |
| backbone                  | pretrained ResNet18 |

Table 5: *Hyperparameters of ACT.*
